# Supplementary material for: Effects of COVID-19 Lockdown on the Emotional and Behavioral Profiles of Preschool Italian Children with and without Familial Risk for Neurodevelopmental Disorders
Source: PubMed Central journal article supplement (PMC8070543; doi:10.3390/brainsci11040477), 2021-04-09
Supplement: brainsci-11-00477-s001.pdf [file brainsci-11-00477-s001.pdf]

Table S1 CBCL 1.5-5 T-scores: Mean (Standard Deviation) and group comparisons at T0

| <b>T-scores on the CBCL scales (T0)</b>         |                    |                        |               |          |                  |
|-------------------------------------------------|--------------------|------------------------|---------------|----------|------------------|
|                                                 | <b>TD (N = 48)</b> | <b>HR-NDD (N = 42)</b> | <b>t (df)</b> | <b>p</b> | <b>Cohen's d</b> |
| <b>Emotionally Reactive</b>                     | 52.04 (4.47)       | 52.21 (4.00)           | -0.192 (88)   | .848     | -.041            |
| <b>Anxious/Depressed</b>                        | 51.46 (3.27)       | 51.19 (2.10)           | 0.455 (88)    | .651     | .096             |
| <b>Somatic Complaints</b>                       | 52.71 (5.49)       | 52.93 (4.53)           | -0.206 (88)   | .837     | -.043            |
| <b>Withdrawn</b>                                | 52.21 (4.52)       | 52.31 (4.84)           | -0.103 (88)   | .919     | -.022            |
| <b>Sleep Problems</b>                           | 53.77 (4.57)       | 53.19 (4.00)           | 0.637 (88)    | .526     | .135             |
| <b>Attention Problems</b>                       | 52.25 (3.73)       | 52.90 (4.68)           | -0.738 (88)   | .463     | -.156            |
| <b>Aggressive Behavior</b>                      | 51.31 (3.42)       | 52.26 (3.90)           | -1.220 (88)   | .226     | -.260            |
| <b>Internalizing Problems</b>                   |                    |                        |               |          |                  |
| <b>Internalizing Problems</b>                   | 43.31 (9.90)       | 45.17 (8.01)           | -0.968 (88)   | .336     | -.205            |
| <b>Externalizing Problems</b>                   |                    |                        |               |          |                  |
| <b>Externalizing Problems</b>                   | 44.92 (8.33)       | 46.10 (9.26)           | -0.636 (88)   | .527     | -.134            |
| <b>Total Problems</b>                           |                    |                        |               |          |                  |
| <b>Total Problems</b>                           | 44.46 (8.75)       | 46.14 (8.52)           | -0.922 (88)   | .359     | -.195            |
| <b>Affective Problems</b>                       |                    |                        |               |          |                  |
| <b>Affective Problems</b>                       | 52.52 (3.58)       | 53.19 (4.20)           | -0.816 (88)   | .417     | -.172            |
| <b>Anxiety Problems</b>                         |                    |                        |               |          |                  |
| <b>Anxiety Problems</b>                         | 51.94 (3.50)       | 51.29 (2.18)           | 1.232 (88)    | .222     | .253             |
| <b>Pervasive Developmental Problems</b>         |                    |                        |               |          |                  |
| <b>Pervasive Developmental Problems</b>         | 52.83 (5.45)       | 53.26 (5.63)           | -0.367 (88)   | .715     | -0.77            |
| <b>Attention Deficit/Hyperactivity Problems</b> |                    |                        |               |          |                  |
| <b>Attention Deficit/Hyperactivity Problems</b> | 52.13 (3.13)       | 53.10 (5.15)           | -1.062 (88)   | .292     | -.231            |
| <b>Oppositional Defiant Problems</b>            |                    |                        |               |          |                  |
| <b>Oppositional Defiant Problems</b>            | 51.42 (4.04)       | 51.24 (2.59)           | 0.246 (88)    | .806     | .052             |

**Table S2.** CBCL 1.5-5 T-scores: Mean (Standard Deviation) and group comparisons at T1

| <b>T-scores on the CBCL scales (T1)</b>         |                    |                        |               |          |                  |
|-------------------------------------------------|--------------------|------------------------|---------------|----------|------------------|
|                                                 | <b>TD (N = 48)</b> | <b>HR-NDD (N = 42)</b> | <b>t (df)</b> | <b>p</b> | <b>Cohen's d</b> |
| <b>Emotionally Reactive</b>                     | 54.25 (8.43)       | 52.21 (4.44)           | 1.458 (88)    | .149     | .297             |
| <b>Anxious/Depressed</b>                        | 54.21 (8.63)       | 51.88 (3.27)           | 1.732 (88)    | .088     | .348             |
| <b>Somatic Complaints</b>                       | 51.44 (3.54)       | 51.10 (2.59)           | 0.517 (88)    | .606     | .109             |
| <b>Withdrawn</b>                                | 53.58 (5.56)       | 52.14 (3.63)           | 1.473 (88)    | .155     | .303             |
| <b>Sleep Problems</b>                           | 52.98 (5.98)       | 53.98 (7.06)           | -0.726 (88)   | .470     | -.153            |
| <b>Attention Problems</b>                       | 53.06 (4.61)       | 53.33 (5.53)           | -0.254 (88)   | .800     | -.054            |
| <b>Aggressive Behavior</b>                      | 54.54 (8.59)       | 53.50 (7.47)           | 0.610 (88)    | .544     | .129             |
| <b>Internalizing Problems</b>                   |                    |                        |               |          |                  |
| <b>Internalizing Problems</b>                   | 43.85 (13.49)      | 44.36 (8.78)           | -0.212 (88)   | .833     | -.044            |
| <b>Externalizing Problems</b>                   | 48.44 (12.00)      | 47.38 (11.44)          | 0.426 (88)    | .671     | .090             |
| <b>Total Problems</b>                           | 46.15 (12.35)      | 46.21 (9.89)           | -0.029 (88)   | .977     | -.006            |
| <b>Affective Problems</b>                       |                    |                        |               |          |                  |
| <b>Affective Problems</b>                       | 53.00 (5.31)       | 52.57 (4.42)           | 0.413 (88)    | .681     | .086             |
| <b>Anxiety Problems</b>                         | 54.77 (9.74)       | 52.52 (3.96)           | 1.466 (88)    | .148     | .295             |
| <b>Pervasive Developmental Problems</b>         | 52.19 (5.21)       | 52.26 (4.17)           | -0.074 (88)   | .941     | -.016            |
| <b>Attention Deficit/Hyperactivity Problems</b> |                    |                        |               |          |                  |
| <b>Attention Deficit/Hyperactivity Problems</b> | 53.48 (5.03)       | 53.21 (5.18)           | 0.245 (88)    | .806     | .052             |
| <b>Oppositional Defiant Problems</b>            | 53.54 (5.79)       | 52.55 (6.23)           | 0.784 (88)    | .435     | .166             |
